# Supplementary material
Source: Springer Nature journal article supplement (https://www.springerprofessional.de/resource/supplementary/13673_2013_36_MOESM2_ESM.pdf/11899356)

Video

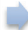

Replay,  
Skip,  
Pause

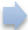

Time  
series

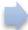

Peak

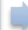

Keyframe

Supplement: MOESM2 [file 11899356]
